# Supplementary material for: Population-genetic properties of differentiated copy number variations in cattle
Source: PubMed Central journal article supplement (PMC4804293; doi:10.1038/srep23161), 2016-03-23

## Population-genetic properties of differentiated copy number variations in cattle

Linyang Xu<sup>1,2,5</sup>, Yali Hou<sup>3,5</sup>, Derek M. Bickhart<sup>1</sup>, Yang Zhou<sup>1,4</sup>, El Hamidi abdel Hay<sup>1</sup>, Jiuzhou Song<sup>2</sup>, Tad S. Sonstegard<sup>1,\*</sup>, Curtis P. Van Tassell<sup>1</sup> and George E. Liu<sup>1,†</sup>

**Table S1. Subspecies, breeds, numbers of animals used in this study.**

| Breed or species             | Acronym | Count | Subspecies         | Usage        | Feature                                                                                                                             |
|------------------------------|---------|-------|--------------------|--------------|-------------------------------------------------------------------------------------------------------------------------------------|
| <b><i>Taurine</i></b>        |         |       |                    |              |                                                                                                                                     |
| Angus                        | ANG     | 47    | <i>Bos taurus</i>  | Beef         | Founded by Angus doddies and Buchan humlies, Aberdeen Angus breed x English longhorns                                               |
| Brown Swiss                  | BSW     | 24    | <i>Bos taurus</i>  | Dairy        | Improved by Austrian Pinzgaur breed                                                                                                 |
| Hereford                     | HFD     | 37    | <i>Bos taurus</i>  | Beef         | Line One                                                                                                                            |
| Holstein                     | HOL     | 67    | <i>Bos taurus</i>  | Dairy        | Holstein is used to describe North American stock while Friesian denotes animals (dual purposes) of a traditional European ancestry |
| <b><i>Indicine</i></b>       |         |       |                    |              |                                                                                                                                     |
| Brahman                      | BRM     | 49    | <i>Bos indicus</i> | Beef         | Guzerat, Kankrej, Gir and Nelore are the founders. Krishna Valley strain contributed less.                                          |
| Nelore                       | NEL     | 34    | <i>Bos indicus</i> | Beef         | The Indian Ongole breed contributed most to the creation of the Nelore                                                              |
| <b><i>African Breeds</i></b> |         |       |                    |              |                                                                                                                                     |
| N'Dama                       | NDA     | 24    | <i>Bos taurus</i>  | Multipurpose | African taurine, heat resistance                                                                                                    |
| Sheko                        | SHK     | 18    | Composite          | Multipurpose | Ancient Taurine×Indicine hybrid                                                                                                     |
| <b>Total</b>                 |         | 300   |                    |              |                                                                                                                                     |

### Population-genetic properties of differentiated copy number variations in cattle

Linyang Xu<sup>1,2,5</sup>, Yali Hou<sup>3,5</sup>, Derek M. Bickhart<sup>1</sup>, Yang Zhou<sup>1,4</sup>, El Hamidi abdel Hay<sup>1</sup>, Jiuzhou Song<sup>2</sup>, Tad S. Sonstegard<sup>1,\*</sup>, Curtis P. Van Tassell<sup>1</sup> and George E. Liu<sup>1,†</sup>

Figure S1. Box-and-whisker plots of  $V_{ST}$  values in four pairwise comparisons.

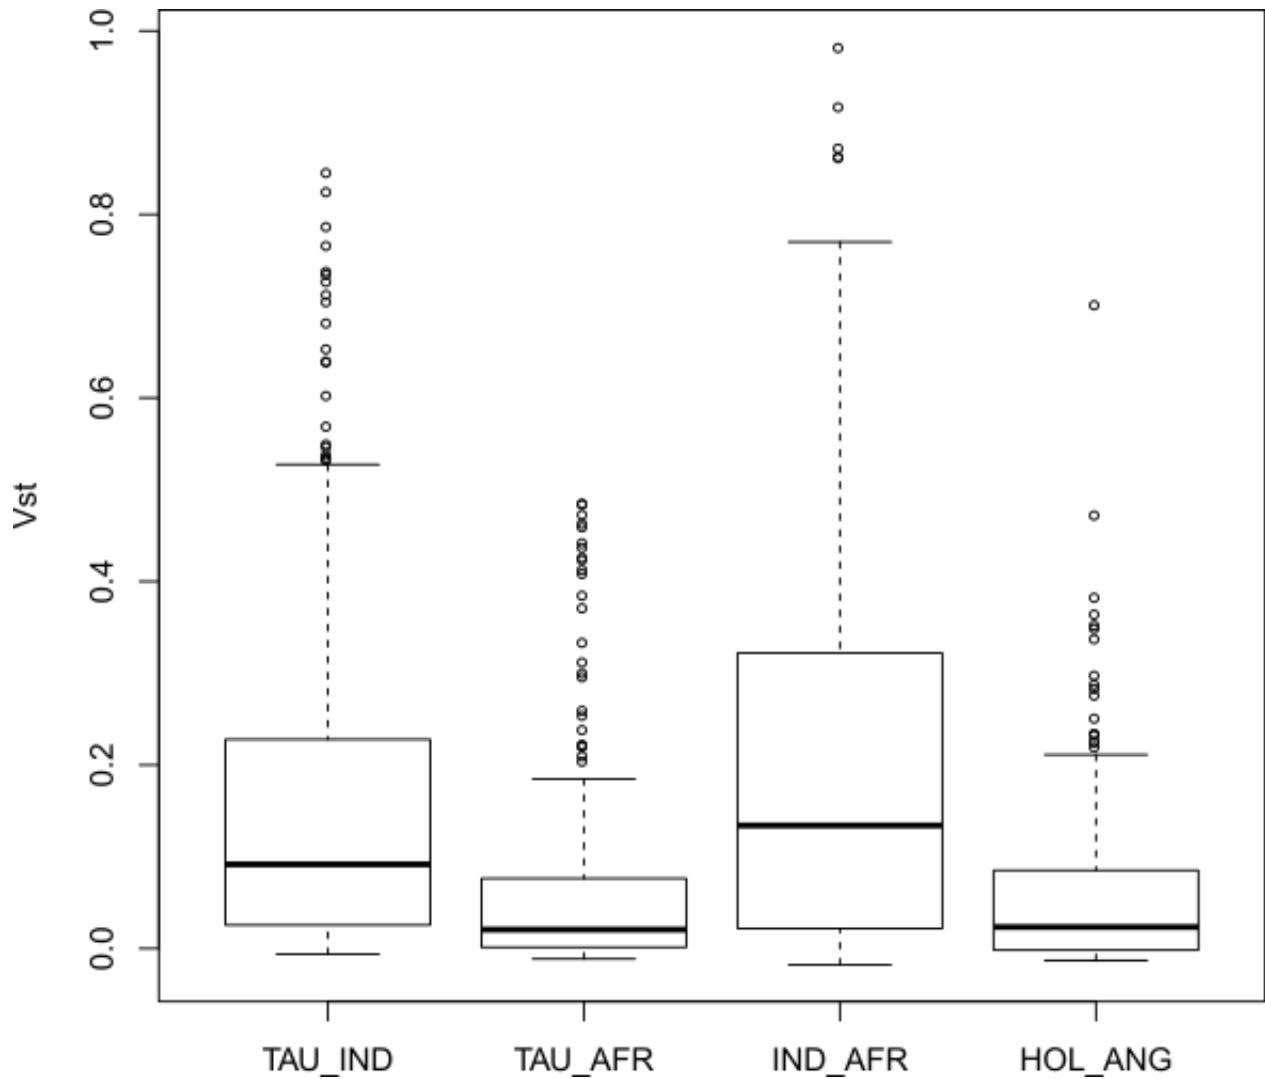

# Population-genetic properties of differentiated copy number variations in cattle

Linyang Xu<sup>1,2,5</sup>, Yali Hou<sup>3,5</sup>, Derek M. Bickhart<sup>1</sup>, Yang Zhou<sup>1,4</sup>, El Hamidi abdel Hay<sup>1</sup>, Jiuzhou Song<sup>2</sup>, Tad S. Sonstegard<sup>1,\*</sup>, Curtis P. Van Tassell<sup>1</sup> and George E. Liu<sup>1,†</sup>

Figure S2. Violin plots of Log R ratios in eight cattle breeds.

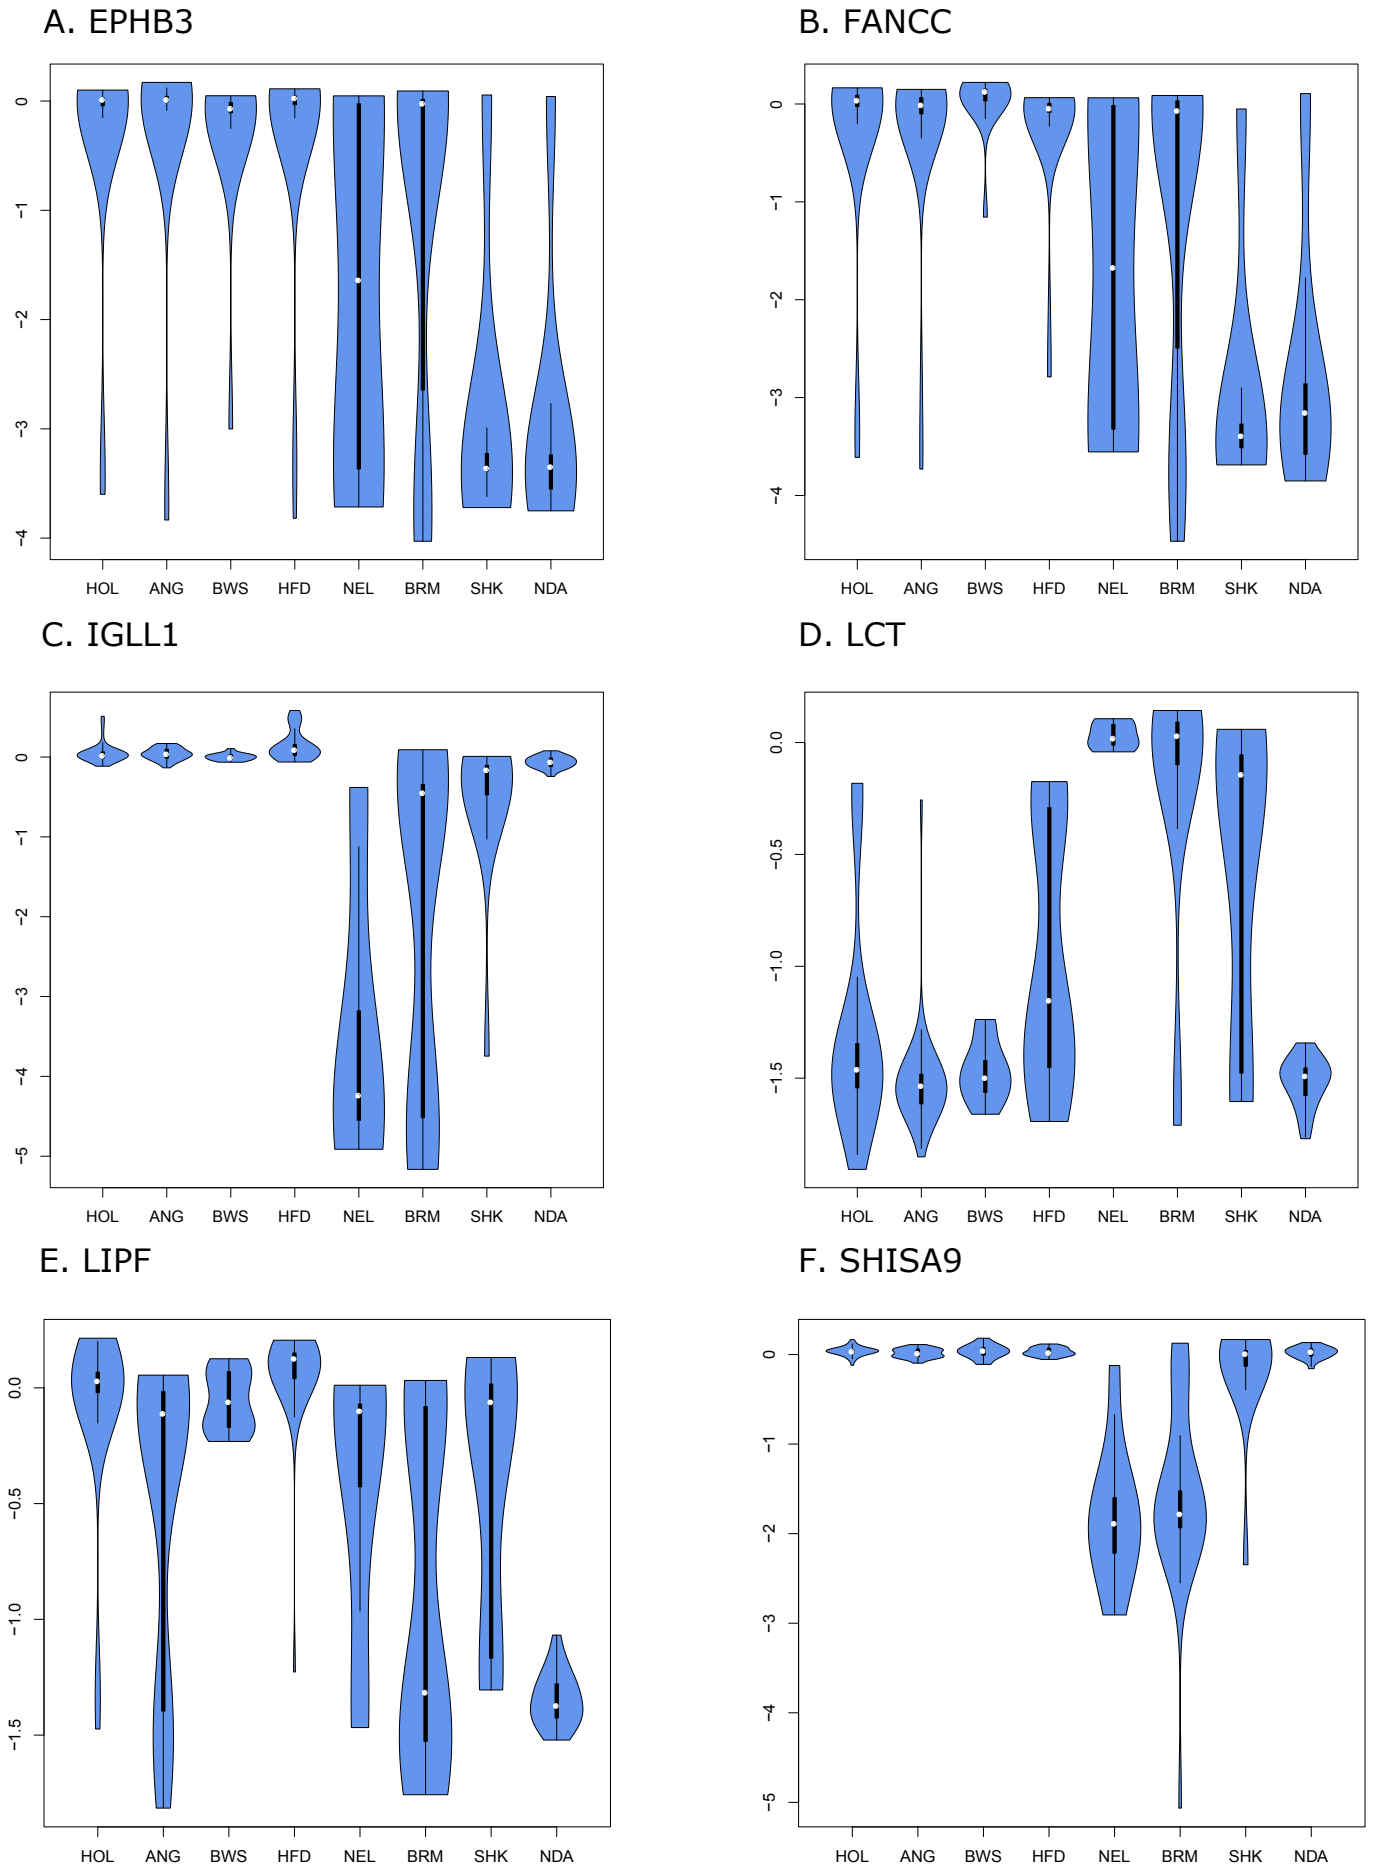

Supplement: srep23161-s1.pdf [file srep23161-s1.pdf]
